# Supplementary material for: Disentangling doping and strain effects at defects of grown MoS2 monolayers with nano-optical spectroscopy
Source: Royal Society of Chemistry journal article supplement (doi:10.1039/d4nr00837e), 2024-01-01
Supplement: d4nr00837e1.pdf [file d4nr00837e1.pdf]

## Electronic Supplementary Information for Disentangling doping and strain effects at defects of grown MoS<sub>2</sub> monolayers with nano-optical spectroscopies

Frederico B. Sousa, Rafael Battistella Nadas, Rafael Martins, Ana P. M. Barboza, Jaqueline S. Soares, Bernardo R. A. Neves, Ive Silvestre, Ado Jorio, and Leandro M. Malard.

### **This Electronic Supplementary Information includes:**

- Figure S1. Optical image and polarized SHG of MoS<sub>2</sub> monolayer A1 sample.
- Figure S2. Far-field and near-field Raman maps of MoS<sub>2</sub> monolayer A2 sample.
- Figure S3. Normalized near-field PL spectra of 21 distinct points of MoS<sub>2</sub> monolayer A2 sample.
- Figure S4. Near-field exciton maps of MoS<sub>2</sub> monolayer A2 sample.
- Figure S5. Far-field exciton maps at the edge of MoS<sub>2</sub> monolayer A2 sample.
- Figure S6. Near-field exciton maps at the edge of MoS<sub>2</sub> monolayer A2 sample.
- Figure S7. Near-field trion and exciton/trion intensity ratio maps at the edge of MoS<sub>2</sub> monolayer A2 sample.
- Figure S8. Near-field Raman profiles along the edge of MoS<sub>2</sub> monolayer A2 sample.
- Figure S9. Near-field exciton maps at the edge of MoS<sub>2</sub> monolayer A1 sample.
- Figure S10. Near-field spatial resolution.
- Figure S11. Near-field Raman modes intensity and frequency profiles along the edge of MoS<sub>2</sub> monolayer A1 sample.

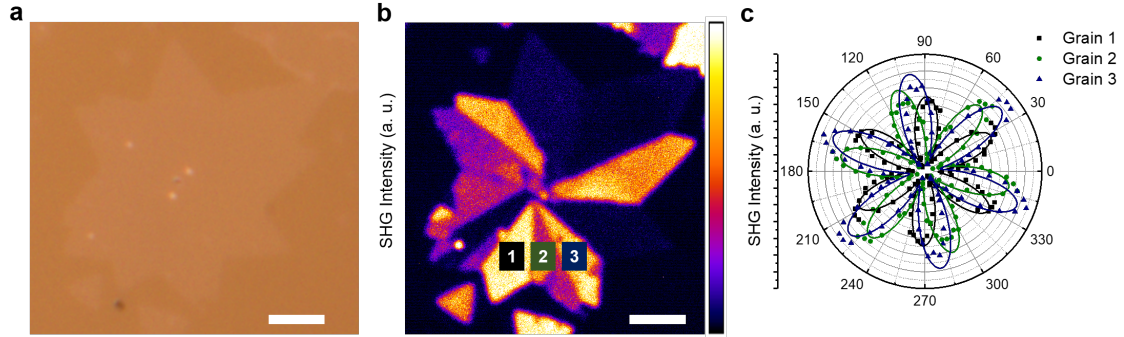

Figure S1: **a** Optical image of MoS<sub>2</sub> monolayer A1 sample shown in Figure 1. **b** SHG intensity image of MoS<sub>2</sub> monolayer A1 sample with the 3 studied grains highlighted. Scale bar: 5  $\mu\text{m}$ . **c** Polarized SHG measurement for grains 1, 2 and 3 of MoS<sub>2</sub> monolayer A1 sample. The relative orientations between them are:  $\theta_{1,2} = 21^\circ$ ,  $\theta_{1,3} = 11^\circ$  and  $\theta_{2,3} = 10^\circ$ .

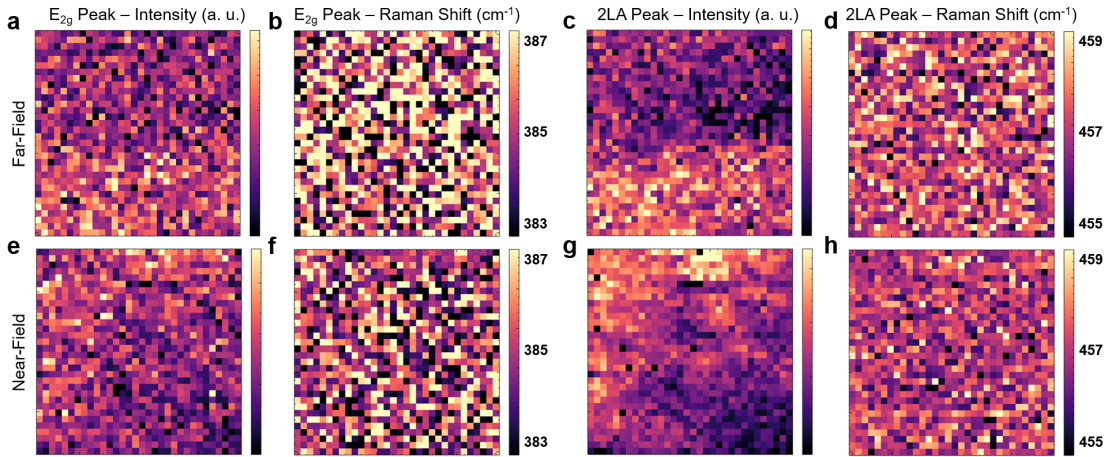

Figure S2: **a-d** Far-field  $E_{2g}$  intensity (**a**),  $E_{2g}$  frequency (**b**), 2LA intensity (**c**), and 2LA frequency (**d**) maps of MoS<sub>2</sub> monolayer A2 sample. **e-h** Near-field  $E_{2g}$  intensity (**e**),  $E_{2g}$  frequency (**f**), 2LA intensity (**g**), and 2LA frequency (**h**) maps of MoS<sub>2</sub> monolayer A2 sample. These maps are from the same region of the exciton maps of Figure 2.

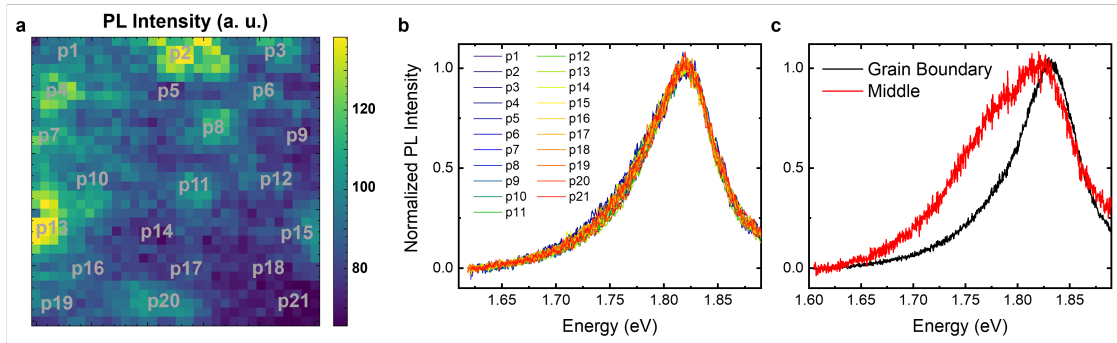

Figure S3: **a** Near-field PL intensity map from Figure 2 highlighting 21 different points selected for the PL spectral shape comparison. **b** Normalized near-field PL spectra from the 21 points shown in **(a)**, which were also shifted in energy when necessary to match all their maximums. A minimal shape variation can be observed, indicating a minor contribution of doping effects. **c** Normalized near-field PL spectra from grain boundary and grain middle regions taken from Figure 1 data for comparison. A significant difference in the spectral shape is noted, confirming the strong doping effect at the grain boundary.

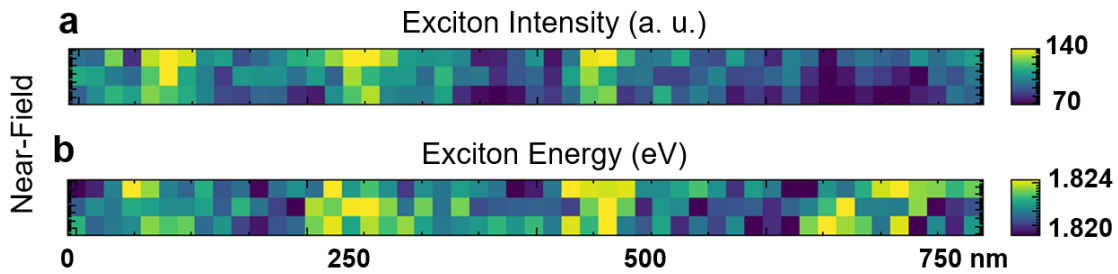

Figure S4: **a,b** Near-field exciton intensity **(a)** and exciton energy **(b)** maps of MoS<sub>2</sub> monolayer A2 sample showing localized strain fields in a different sample region.

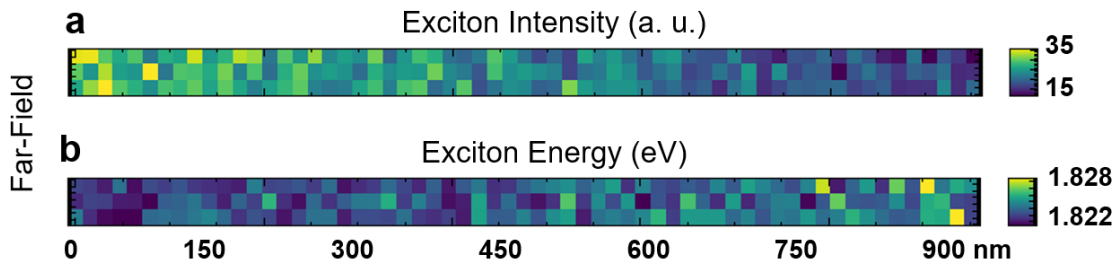

Figure S5: **a,b** Far-field exciton intensity **(a)** and exciton energy **(b)** maps at the edge of MoS<sub>2</sub> monolayer A2 sample showing no localized optical features. These maps are from the same region of the maps of Figure 3.

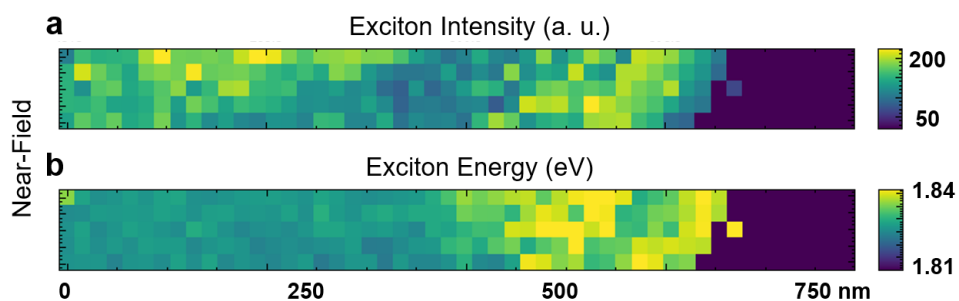

Figure S6: **a,b** Near-field exciton intensity (**a**) and exciton energy (**b**) maps in another edge region of MoS<sub>2</sub> monolayer A2 sample showing similar PL enhancement and blueshift features presented at the edge region of Figure 3.

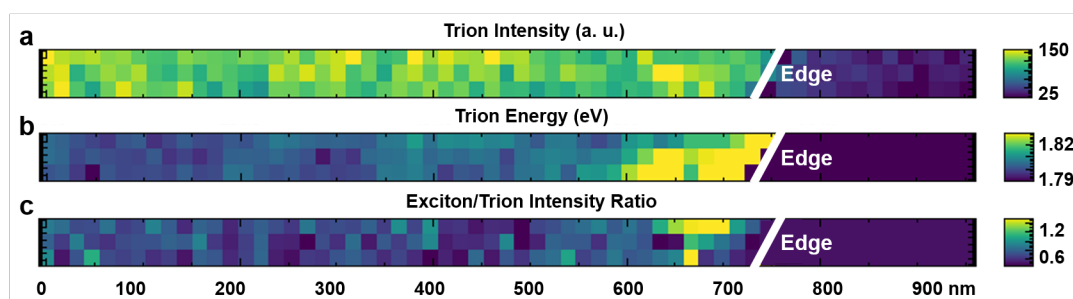

Figure S7: **a,b** NF TEPL hyperspectral maps of the trion intensity (**a**) and energy (**b**) at the same edge region of the MoS<sub>2</sub> monolayer shown in Figure 3. **c** Exciton/trion intensity ration map of the same edge. The similar observed blueshift of the exciton and trion emissions together with the low variation of the exciton/trion intensity ratio at the edge indicate no relevant doping effect.

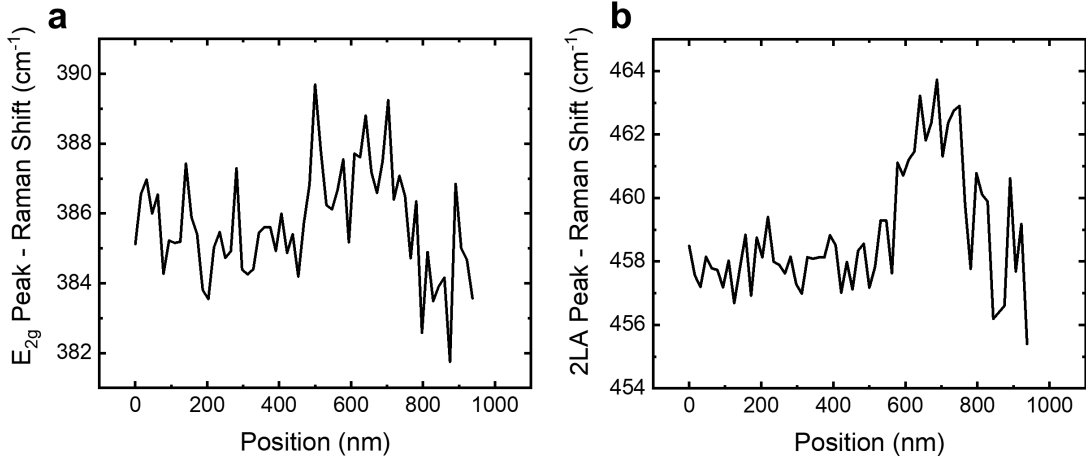

Figure S8: **a,b**  $E_{2g}$  (**a**) and 2LA (**b**) frequency profiles along the edge of MoS<sub>2</sub> monolayer A2 sample.

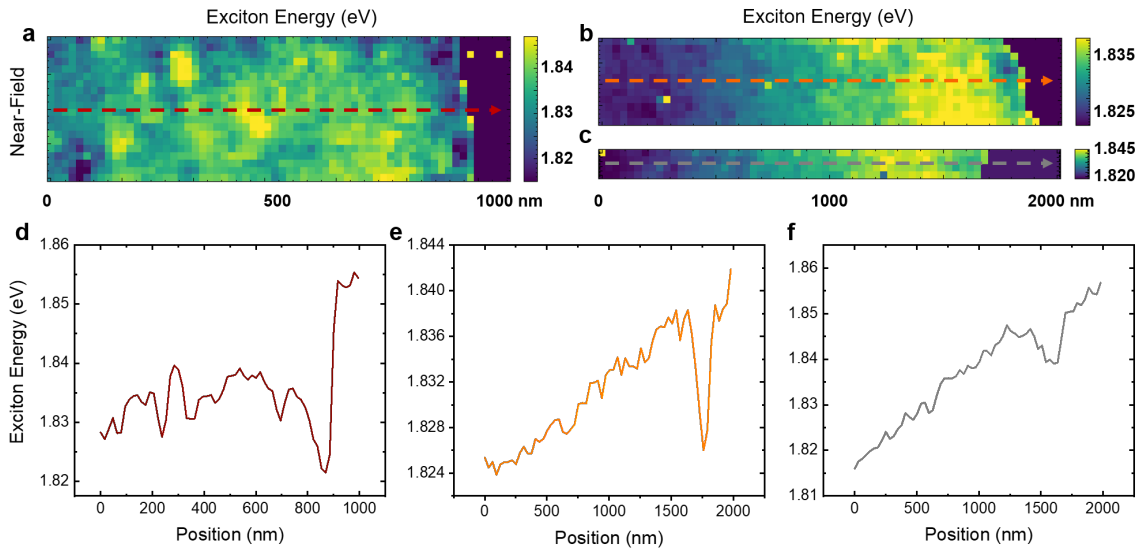

Figure S9: **a-c** Near-field exciton energy maps in other edge regions of MoS<sub>2</sub> monolayer A1 sample showing a similar PL redshift response presented at the edge region of Figure 4. **d-f** Exciton energy profiles along the edges of (**a-c**) highlighting the PL redshift feature. The profiles colors correspond to the dashed arrow colors of (**a-c**).

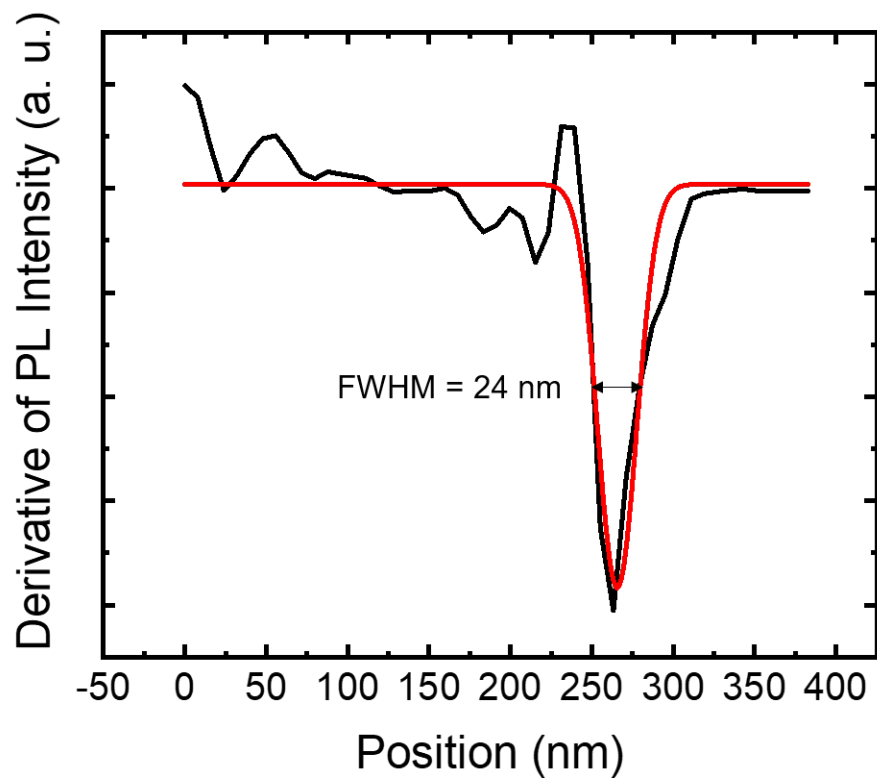

Figure S10: To extract the spatial resolution of the near-field measurements we differentiated the PL intensity profile along the edge (in black) of Figure 4 and fitted it with a Gaussian function (in red). The spatial resolution of the measurement is the fitted full width at half maximum (FWHM) = 24 nm.

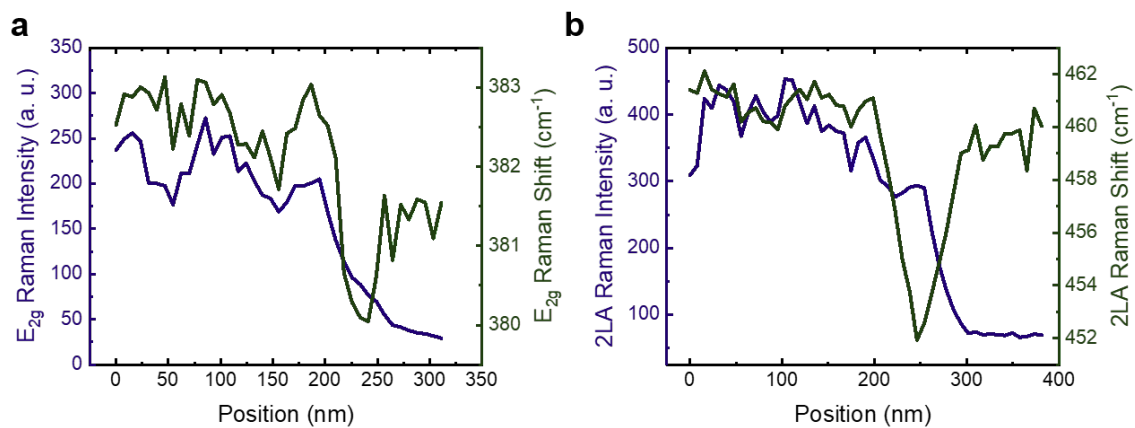

Figure S11: **a,b** E<sub>2g</sub> (**a**) and 2LA (**b**) intensity and frequency profiles along the edge of MoS<sub>2</sub> monolayer A1 sample. These profiles were taken from the near-field Raman maps of Figure 5.
